# Supplementary material for: Deletion of TSPO Resulted in Change of Metabolomic Profile in Retinal Pigment Epithelial Cells
Source: PubMed Central journal article supplement (PMC6470938; doi:10.3390/ijms20061387), 2019-03-19
Supplement: ijms-20-01387-s001.pdf [file ijms-20-01387-s001.pdf]

## Supplementary Materials

**Table 1.** Comparison of metabolite changes between KOT and KOC, WTT/WTC, KOT/WTT, or KOC/WTC. WTC: Wildtype cells without oxLDL treatment; WTT, Wildtype cells with oxLDL treatment. KOC, *TSPO* knockout cells without oxLDL treatment; KOT, *TSPO* knockout cells with oxLDL treatment.

| Mass (m/z)                          | RT(min) | Putative Metabolite          | +/- | KOT/KOC |       | WTT/WTC |       | KOT/WTT |       | KOC/WTC |       |
|-------------------------------------|---------|------------------------------|-----|---------|-------|---------|-------|---------|-------|---------|-------|
|                                     |         |                              |     | P value | Ratio | P value | Ratio | P value | Ratio | P value | Ratio |
| <b>Arginine/creatine metabolism</b> |         |                              |     |         |       |         |       |         |       |         |       |
| 89.05                               | 14.3    | sarcosine *                  | +   | 0.003   | 2.75  | 0.001   | 2.58  | 0.012   | 1.55  | 0.098   | 1.45  |
| 113.06                              | 15.3    | Creatinine*                  | -   | 0.002   | 2.68  | 0.004   | 3.36  | 0.044   | 1.73  | 0.005   | 2.17  |
| 115.06                              | 13.4    | Proline *                    | -   | 0.012   | 1.36  | 0.012   | 1.66  | 0.114   | 1.16  | 0.037   | 1.42  |
| 123.99                              | 12.2    | Phosphonoacetaldehyde        | +   | 0.972   | 0.95  | 0.047   | 0.81  | 0.179   | 0.86  | 0.19    | 0.73  |
| 131.07                              | 14.2    | Creatine *                   | +   | 0.007   | 3.39  | <0.001  | 4.69  | 0.001   | 1.74  | 0.033   | 2.41  |
| 174.11                              | 26.5    | Arginine *                   | +   | 0.041   | 0.69  | 0.04    | 0.73  | 0.049   | 0.71  | 0.054   | 0.75  |
| 132.05                              | 15.0    | Asparagine *                 | +   | 0.002   | 0.65  | 0.014   | 0.64  | 0.046   | 1.27  | 0.055   | 1.25  |
| 189.06                              | 14.1    | N-Acetyl-L-glutamate         | -   | 0.086   | 2.17  | 0.001   | 2.92  | 0.012   | 2.24  | 0.046   | 3.02  |
| 211.04                              | 15.1    | Phosphocreatine*             | +   | <0.001  | 2.9   | <0.001  | 7.43  | 0.002   | 1.37  | <0.001  | 3.5   |
| <b>Histidine/lysine metabolism</b>  |         |                              |     |         |       |         |       |         |       |         |       |
| 156.05                              | 11      | 4-Imidazolone-5-propanoate   | +   | 0.03    | 1.52  | 0.01    | 1.67  | 0.615   | 0.94  | 0.833   | 1.03  |
| 159.09                              | 9.3     | 5-Acetamidopentanoate        | +   | 0.264   | 0.13  | 0.043   | 0.03  | 0.063   | 0.84  | 0.267   | 0.21  |
| 190.06                              | 16.6    | N-Carbamyl-L-glutamate *     | -   | 0.001   | 1.75  | <0.001  | 1.87  | <0.001  | 1.66  | 0.002   | 1.77  |
| 188.12                              | 11.6    | N6-Acetyl-L-lysine *         | +   | 0.256   | 1.18  | 0.016   | 1.65  | 0.002   | 0.58  | 0.263   | 0.8   |
| <b>Glycolysis</b>                   |         |                              |     |         |       |         |       |         |       |         |       |
| 88.02                               | 8.3     | Pyruvate *                   | -   | 0.004   | 0.69  | 0.001   | 0.64  | 0.043   | 1.22  | 0.039   | 1.12  |
| 92.05                               | 10.1    | Glycerol                     | -   | 0.287   | 0.14  | 0.035   | 0.07  | 0.426   | 1.04  | 0.418   | 0.47  |
| 168.99                              | 16.2    | Glyceraldehyde 3-P*          | -   | 0.002   | 1.668 | 0.031   | 1.409 | <0.001  | 3.009 | <0.001  | 2.542 |
| 182.08                              | 13.6    | Mannitol                     | -   | 0.696   | 0.98  | 0.011   | 1.57  | 0.126   | 1.17  | 0.002   | 1.87  |
| 185.99                              | 17.2    | 3-Phospho-D-glycerate        | -   | 0.03    | 0.76  | 0.004   | 0.81  | 0.008   | 1.37  | 0.005   | 1.45  |
| 260.03                              | 16.8    | Glucose 1-phosphate *        | -   | 0.015   | 1.09  | 0.042   | 1.58  | 0.144   | 1.07  | 0.043   | 1.55  |
| 260.03                              | 17.2    | Fructose 6-phosphate *       | -   | 0.566   | 0.94  | 0.003   | 1.21  | 0.047   | 1.15  | 0.013   | 1.48  |
| 340                                 | 18.5    | D-Fructose 1,6-bisphosphate* | -   | 0.042   | 1.27  | 0.039   | 1.49  | 0.023   | 1.63  | <0.001  | 1.92  |
| <b>TCA cycle</b>                    |         |                              |     |         |       |         |       |         |       |         |       |
| 118.03                              | 13.9    | Succinate *                  | -   | 0.029   | 1.24  | 0.18    | 0.81  | 0.002   | 0.67  | 0.003   | 0.44  |
| 132.01                              | 16.3    | Oxaloacetate *               | -   | 0.234   | 1.01  | <0.001  | 1.21  | <0.001  | 0.86  | 0.008   | 1.03  |
| 174.02                              | 18.4    | cis-Aconitate*               | -   | 0.002   | 1.44  | 0.038   | 1.2   | 0.003   | 1.54  | 0.002   | 1.28  |
| 192.03                              | 18.5    | Citrate *                    | -   | 0.008   | 0.85  | 0.004   | 0.78  | <0.001  | 1.91  | <0.001  | 1.74  |
| <b>Glutathione homeostasis</b>      |         |                              |     |         |       |         |       |         |       |         |       |

|                                                |      |                          |   |        |      |        |      |        |      |        |      |
|------------------------------------------------|------|--------------------------|---|--------|------|--------|------|--------|------|--------|------|
| 230.02                                         | 15.7 | Ribose 5-phosphate *     | - | 0.012  | 1.24 | 0.003  | 1.3  | <0.001 | 1.95 | <0.001 | 2.05 |
| 276.02                                         | 18.0 | 6-Phospho-D-gluconate    | - | 0.048  | 1.31 | 0.013  | 1.52 | 0.006  | 1.28 | 0.038  | 1.49 |
| 307.083                                        | 14.1 | Glutathione*             | + | 0.08   | 1.61 | 0.43   | 1.3  | 0.77   | 1.03 | 0.64   | 0.83 |
| 612.63                                         | 17.3 | Glutathione disulphide * | - | 0.005  | 2.44 | 0.031  | 1.84 | 0.011  | 2.23 | 0.036  | 1.68 |
| 745.09                                         | 17.3 | NADPH *                  | + | 0.003  | 1.23 | 0.03   | 1.16 | 0.001  | 1.35 | 0.007  | 1.27 |
| <b>Indicators of oxidative stress</b>          |      |                          |   |        |      |        |      |        |      |        |      |
| 136.04                                         | 9.8  | Hypoxanthine *           | + | 0.573  | 0.83 | 0.755  | 1.03 | 0.03   | 1.54 | 0.059  | 1.91 |
| 152.03                                         | 11.2 | Xanthine*                | - | 0.003  | 0.59 | 0.002  | 0.53 | 0.004  | 1.57 | 0.019  | 1.43 |
| 155.07                                         | 14.2 | Histidine *              | + | 0.024  | 1.3  | 0.015  | 1.18 | 0.026  | 1.19 | 0.333  | 1.08 |
| 168.03                                         | 12.6 | Urate*                   | - | <0.001 | 1.57 | 0.021  | 2.3  | 0.102  | 0.61 | 0.03   | 0.89 |
| 226.106                                        | 15.2 | carnosine                | + | 0.06   | 1.14 | 0.1    | 1.32 | 0.047  | 1.33 | 0.01   | 1.5  |
| 240.122                                        | 13.6 | homocarnosine            | + | 0.04   | 1.22 | 0.28   | 0.88 | 0.011  | 1.85 | 0.01   | 1.34 |
| <b>Taurine/cysteine metabolism</b>             |      |                          |   |        |      |        |      |        |      |        |      |
| 109.02                                         | 14.7 | Hypotaurine              | + | 0.217  | 1.17 | 0.016  | 1.38 | 0.433  | 0.97 | 0.392  | 1.15 |
| 105.04                                         | 15.5 | Serine *                 | - | 0.014  | 0.75 | 0.016  | 0.71 | 0.605  | 0.97 | 0.435  | 0.92 |
| 125.014                                        | 15.0 | Taurine*                 | + | 0.44   | 0.95 | 0.62   | 1.02 | 0.019  | 1.17 | 0.03   | 1.26 |
| 125.999                                        | 11.0 | Hydroxyethansulphonate   | - | 0.004  | 1.47 | 0.006  | 1.72 | 0.335  | 0.93 | 0.42   | 1.09 |
| 147.05                                         | 10.5 | O-Acetyl-L-serine        | - | 0.002  | 1.7  | 0.005  | 2.51 | 0.313  | 0.9  | 0.128  | 1.33 |
| 153.01                                         | 14.4 | 3-Sulfino-L-alanine      | - | <0.001 | 2.9  | 0.005  | 2.34 | 0.001  | 1.4  | 0.419  | 1.12 |
| 169                                            | 15.8 | Cysteic Acid             | - | 0.001  | 2.92 | <0.001 | 3.87 | 0.022  | 1.49 | 0.001  | 1.97 |
| <b>Pyrimidines and purines</b>                 |      |                          |   |        |      |        |      |        |      |        |      |
| 111.04                                         | 11.4 | Cytosine *               | + | 0.954  | 0.97 | 0.049  | 0.79 | 0.001  | 0.46 | 0.004  | 0.38 |
| 114.04                                         | 12.0 | 5,6-Dihydrouracil        | + | 0.029  | 0.47 | 0.008  | 0.5  | 0.994  | 1.02 | 0.768  | 1.09 |
| 125.06                                         | 7.4  | 5-Methylcytosine         | + | 0.012  | 0.58 | 0.009  | 0.54 | 0.435  | 0.97 | 0.561  | 0.9  |
| 126.04                                         | 12.6 | Thymine *                | + | <0.001 | 1.91 | 0.011  | 1.4  | <0.001 | 1.48 | 0.332  | 1.08 |
| 128.06                                         | 14.3 | 5,6-Dihydrothymine       | + | <0.001 | 2.38 | 0.001  | 2.59 | 0.001  | 1.76 | 0.003  | 1.91 |
| 146.07                                         | 14.7 | Glutamine *              | + | 0.051  | 0.71 | 0.007  | 0.67 | 0.001  | 1.39 | 0.126  | 1.31 |
| 244.11                                         | 15.1 | dihydrothymidine         | + | 0.016  | 1.6  | 0.013  | 1.65 | 0.051  | 1.26 | 0.142  | 1.3  |
| 268.08                                         | 10.4 | Inosine                  | - | 0.001  | 1.2  | 0.291  | 0.95 | 0.022  | 0.9  | 0.001  | 0.72 |
| <b>Fatty acids biosynthesis and conjugates</b> |      |                          |   |        |      |        |      |        |      |        |      |
| 102.07                                         | 12.8 | Pentanoate               | + | 0.255  | 0.21 | 0.003  | 0.17 | 0.003  | 0.57 | 0.183  | 0.46 |
| 144.12                                         | 4.2  | [FA (8:0)] octanoic acid | - | 0.596  | 0.89 | 0.008  | 1.38 | 0.025  | 0.84 | 0.235  | 1.29 |
| 146.09                                         | 4.5  | hydroxy-heptanoic acid   | - | 0.077  | 1.49 | 0.002  | 1.52 | 0.739  | 1.04 | 0.853  | 1.06 |
| 174.13                                         | 7.3  | hydroxy-nonanoic acid    | - | 0.294  | 1.17 | 0.02   | 1.49 | 0.106  | 0.77 | 0.857  | 0.98 |
| 224.14                                         | 3.8  | [FA] Methyl jasmonate    | - | 0.008  | 2.24 | 0.001  | 1.91 | 0.062  | 1.45 | 0.159  | 1.23 |
| 228.14                                         | 4.2  | Traumatic acid           | - | 0.004  | 1.54 | 0.033  | 1.25 | 0.172  | 1.1  | 0.294  | 0.9  |
| 228.17                                         | 3.9  | oxo-tridecanoic acid     | - | 0.307  | 1.22 | 0.028  | 0.74 | 0.078  | 1.43 | 0.263  | 0.86 |

|                             |      |                                             |   |        |       |        |       |       |      |       |      |
|-----------------------------|------|---------------------------------------------|---|--------|-------|--------|-------|-------|------|-------|------|
| 240.17                      | 4.0  | oxo-Tetradecenoic acid                      | - | 0.002  | 5.85  | 0.003  | 4.76  | 0.256 | 1.24 | 0.888 | 1.01 |
| 242.19                      | 3.8  | oxo-tetradecanoic acid                      | - | 0.014  | 1.7   | 0.014  | 1.69  | 0.009 | 1.26 | 0.27  | 1.25 |
| 246.15                      | 4.6  | 3-Hydroxydodecanedioic acid                 | - | <0.001 | 6.37  | 0.001  | 4.76  | 0.145 | 1.37 | 0.721 | 1.03 |
| 278.22                      | 3.5  | octadecatrienoic acid                       | + | <0.001 | 4.73  | 0.032  | 3.03  | 0.077 | 0.67 | 0.092 | 0.43 |
| 284.27                      | 3.6  | Octadecanoic acid                           | - | 0.347  | 1.15  | 0.041  | 0.66  | 0.016 | 1.97 | 0.302 | 1.12 |
| 308.27                      | 3.6  | Eicosadienoic acid                          | - | 0.853  | 1.02  | 0.007  | 0.83  | 0.787 | 0.98 | 0.107 | 0.8  |
| 312.23                      | 3.8  | 13S-hydroperoxy-9Z,11E-octadecadienoic acid | - | 0.005  | 3.55  | 0.015  | 3.08  | 0.514 | 1.11 | 0.992 | 0.96 |
| 312.27                      | 3.5  | oxo-nonadecanoic acid                       | + | 0.011  | 1.69  | 0.005  | 2.04  | 0.081 | 1.37 | 0.009 | 1.66 |
| 328.24                      | 3.6  | Docosahexaenoic acid                        | - | 0.492  | 0.91  | 0.018  | 0.69  | 0.015 | 1.68 | 0.08  | 1.27 |
| 330.24                      | 4.1  | trihydroxyoctadecenoic acid                 | - | <0.001 | 26    | <0.001 | 13.58 | 0.014 | 1.47 | 0.356 | 0.77 |
| 340.3                       | 3.5  | oxo-heneicosanoic acid                      | + | 0.005  | 2.26  | 0.003  | 2.39  | 0.032 | 1.4  | 0.085 | 1.48 |
| 368.22                      | 4.2  | Prostaglandin G2                            | - | <0.001 | >1000 | <0.001 | >1000 | 0.039 | 1.25 | ND    | 1    |
| <b>Carnitines</b>           |      |                                             |   |        |       |        |       |       |      |       |      |
| 203.12                      | 10.2 | O-Acetylcarnitine*                          | + | 0.029  | 1.3   | 0.028  | 1.42  | 0.647 | 1.04 | 0.263 | 1.14 |
| 231.15                      | 7.9  | O-Butanoylcarnitine                         | + | 0.011  | 0.12  | 0.001  | 0.19  | 0.005 | 0.32 | 0.125 | 0.5  |
| 399.33                      | 4.2  | L-Palmitoylcarnitine                        | + | <0.001 | 7.4   | 0.002  | 12.62 | 0.348 | 0.69 | 0.449 | 1.19 |
| 425.35                      | 4.2  | Oleoylcarnitine                             | + | 0.004  | 2.26  | 0.012  | 2.78  | 0.648 | 0.89 | 0.547 | 1.09 |
| 427.37                      | 4.1  | Stearoylcarnitine                           | + | 0.001  | 5.57  | 0.001  | 7.96  | 0.6   | 0.87 | 0.446 | 1.24 |
| <b>Energy metabolism</b>    |      |                                             |   |        |       |        |       |       |      |       |      |
| 347.06                      | 13.4 | AMP*                                        | + | <0.001 | 1.46  | <0.001 | 1.49  | 0.154 | 1.05 | 0.123 | 1.07 |
| 427.03                      | 15.1 | ADP *                                       | - | 0.237  | 1.1   | 0.026  | 1.23  | 0.102 | 1.18 | 0.002 | 1.33 |
| 443.02                      | 18.2 | GDP *                                       | - | 0.075  | 1.33  | 0.018  | 1.81  | 0.748 | 1.03 | 0.047 | 1.41 |
| 507                         | 16.7 | ATP *                                       | - | 0.006  | 1.18  | 0.008  | 1.34  | 0.145 | 1.1  | 0.004 | 1.25 |
| 522.99                      | 19.8 | GTP*                                        | - | 0.05   | 1.28  | 0.08   | 1.3   | 0.13  | 1.11 | 0.43  | 1.12 |
| 665.12                      | 13.1 | NADH *                                      | - | 0.005  | 1.41  | 0.004  | 1.6   | 0.383 | 1.08 | 0.018 | 1.23 |
| <b>Sphingolipids</b>        |      |                                             |   |        |       |        |       |       |      |       |      |
| 273.27                      | 5.2  | Hexadecasphinganine                         | + | <0.001 | 23.71 | <0.001 | 35.73 | 0.197 | 0.76 | 0.403 | 1.15 |
| 299.28                      | 7.3  | Sphingenine                                 | + | 0.372  | 0.78  | <0.001 | 0.8   | 0.001 | 1.75 | 0.053 | 1.78 |
| 327.31                      | 4.0  | N,N-Dimethylsphing-4-enine                  | + | 0.006  | 2.65  | 0.003  | 2.34  | 0.613 | 0.92 | 0.22  | 0.81 |
| 329.33                      | 4.8  | dimethylaminooctadecanediol                 | + | 0.003  | 2.15  | 0.002  | 1.91  | 0.016 | 1.62 | 0.016 | 1.44 |
| 535.5                       | 3.7  | Cer (d18:2/16:0)                            | - | 0.091  | 1.4   | 0.004  | 2.5   | 0.139 | 0.71 | 0.138 | 1.26 |
| 537.51                      | 3.6  | Cer (18:1 16:0)                             | + | 0.204  | 1.25  | 0.002  | 1.78  | 0.002 | 0.56 | 0.192 | 0.79 |
| 699.57                      | 3.7  | Glucosylceramide (d18:1/16:0)               | - | 0.585  | 1.12  | 0.01   | 1.22  | 0.628 | 0.94 | 0.69  | 1.03 |
| 730.6                       | 3.8  | SM(d18:1/18:0)                              | + | 0.493  | 1.1   | 0.048  | 1.36  | 0.114 | 0.78 | 0.738 | 0.97 |
| 809.67                      | 3.7  | Glucosylceramide (d18:1/24:1)               | - | 0.024  | 0.69  | 0.012  | 0.61  | 0.428 | 0.93 | 0.207 | 0.83 |
| <b>Glycerophospholipids</b> |      |                                             |   |        |       |        |       |       |      |       |      |
| 105.08                      | 19   | diethanolamine                              | + | 0.376  | 0.76  | 0.044  | 0.5   | 0.569 | 0.85 | 0.056 | 0.56 |

|                      |      |                         |   |        |       |        |       |        |      |       |       |
|----------------------|------|-------------------------|---|--------|-------|--------|-------|--------|------|-------|-------|
| 410.24               | 4.3  | LPA 16:0                | - | 0.002  | 2.25  | 0.031  | 2.04  | 0.018  | 1.61 | 0.134 | 1.46  |
| 437.29               | 4.2  | LPE 16:0 ether          | - | 0.002  | 2.06  | 0.005  | 1.97  | 0.001  | 2    | 0.009 | 1.91  |
| 438.27               | 4.1  | LPA 18:0                | - | 0.001  | 2.74  | 0.014  | 2.31  | 0.015  | 1.31 | 0.588 | 1.1   |
| 453.29               | 4.3  | LPE 16:0                | + | 0.106  | 2.05  | <0.001 | 2.89  | <0.001 | 1.53 | 0.205 | 2.16  |
| 481.35               | 4.3  | Lyso PC 16:2            | + | 0.194  | 8.27  | <0.001 | 10.21 | 0.177  | 0.82 | 0.436 | 1.02  |
| 495.33               | 4.3  | LPC 16:0                | + | 0.059  | 2.23  | 0.002  | 3.65  | 0.026  | 1.4  | 0.112 | 2.29  |
| 509.38               | 4.2  | Lyso PC 18:0 ether      | + | 0.195  | 7.88  | <0.001 | 5.04  | 0.03   | 0.62 | 0.307 | 0.39  |
| 523.36               | 4.2  | LPC 18:0                | + | 0.005  | 3.74  | 0.001  | 4.92  | 0.573  | 1.14 | 0.172 | 1.5   |
| 676.54               | 3.7  | PA O-18:0/17:0          | + | <0.001 | 5.7   | 0.002  | 5.19  | 0.761  | 1.03 | 0.886 | 0.94  |
| 678.48               | 3.5  | LPG 30:1 ether          | - | 0.001  | 2.64  | 0.01   | 2.17  | 0.111  | 1.41 | 0.154 | 1.16  |
| 680.5                | 3.5  | PG 30:0 ether           | - | <0.001 | 4.38  | 0.008  | 2.4   | 0.213  | 1.26 | 0.039 | 0.69  |
| 694.48               | 3.5  | PG 30:0                 | - | 0.002  | 0.46  | 0.013  | 0.54  | 0.008  | 1.87 | 0.003 | 2.22  |
| 720.49               | 3.5  | PG 32:1                 | - | 0.008  | 0.56  | 0.03   | 0.65  | 0.013  | 1.72 | 0.005 | 2     |
| 722.51               | 3.5  | PG 32:0                 | - | 0.003  | 0.49  | 0.004  | 0.64  | 0.001  | 1.79 | 0.002 | 2.32  |
| 734.55               | 3.5  | LPG 34:1 ether          | - | <0.001 | 2.38  | 0.025  | 1.66  | 0.56   | 1.06 | 0.084 | 0.74  |
| 771.54               | 3.8  | PS 36:3 ether           | - | 0.05   | 34.24 | 0.12   | >1000 | 0.32   | 2.52 | 0.37  | >1000 |
| 773.54               | 3.6  | PE 40:7 ether           | - | 0.017  | 0.75  | 0.001  | 0.64  | 0.538  | 1.06 | 0.068 | 0.9   |
| 773.557              | 3.7  | PS 36:2 ether           | + | 0.06   | 139.3 | 0.12   | 19.83 | 0.19   | 1.05 | 0.85  | 0.15  |
| 776.56               | 3.5  | PG 36:1                 | - | 0.071  | 2.07  | 0.011  | 1.79  | <0.001 | 1.23 | 0.965 | 1.07  |
| 783.58               | 3.7  | PC 36:3                 | + | <0.001 | 2.25  | <0.001 | 2.29  | 0.145  | 1.12 | 0.001 | 1.14  |
| 785.52               | 3.5  | PS 36:3                 | - | <0.001 | 2.44  | 0.002  | 3.01  | 0.07   | 0.78 | 0.855 | 0.96  |
| 797.56               | 3.7  | PS 38:4 ether           | + | <0.001 | >1000 | <0.001 | >1000 | 0.014  | 1.14 | *ND   | 1     |
| 799.57               | 3.7  | PS 38:3 ether           | + | <0.001 | 9.45  | <0.001 | 9.86  | 0.355  | 1.08 | 0.477 | 1.13  |
| 815.57               | 3.5  | PS 38:2                 | - | 0.01   | 0.66  | 0.035  | 0.79  | 0.052  | 0.77 | 0.277 | 0.92  |
| 817.58               | 3.5  | PS 38:1                 | - | 0.042  | 0.74  | 0.003  | 0.74  | 0.025  | 0.81 | 0.08  | 0.81  |
| 831.58               | 3.7  | PC 40:7                 | + | 0.001  | 0.47  | 0.05   | 0.61  | 0.181  | 1.2  | 0.037 | 1.56  |
| 843.6                | 3.5  | PS 40:2                 | - | 0.003  | 0.52  | 0.001  | 0.62  | 0.017  | 0.67 | 0.027 | 0.81  |
| 858.53               | 3.5  | PI 36:4                 | - | 0.002  | 2.24  | <0.001 | 2.41  | 0.008  | 1.36 | 0.037 | 1.46  |
| 859.61               | 3.7  | PC 42:7                 | + | 0.015  | 0.55  | 0.007  | 0.52  | 0.1    | 1.22 | 0.44  | 1.16  |
| 866.51               | 3.4  | PG 44:12                | - | 0.003  | 0.54  | 0.014  | 0.66  | 0.005  | 1.51 | 0.006 | 1.84  |
| 871.63               | 3.5  | PS 42:2                 | - | 0.001  | 0.3   | <0.001 | 0.4   | <0.001 | 0.6  | 0.127 | 0.81  |
| 879.59               | 3.6  | PI 36:0                 | + | 0.157  | 0.57  | 0.038  | 0.65  | 0.001  | 0.4  | 0.045 | 0.45  |
| 900.57               | 3.5  | PI 17:0/22:4            | - | 0.013  | 0.77  | 0.003  | 0.7   | 0.164  | 1.1  | 0.895 | 1.01  |
| <b>Miscellaneous</b> |      |                         |   |        |       |        |       |        |      |       |       |
| 100.05               | 4.4  | glutaraldehyde          | - | 0.839  | 1.01  | 0.002  | 0.66  | <0.001 | 1.77 | 0.336 | 1.15  |
| 172.01               | 13.8 | sn-glycerol-1-phosphate | - | 0.088  | 1.52  | 0.003  | 2.22  | 0.08   | 1.29 | 0.04  | 1.88  |
| 179.08               | 10.7 | D-Glucosamine or isomer | - | 0.634  | 1.11  | 0.043  | 1.42  | 0.723  | 0.96 | 0.152 | 1.23  |

|         |      |                                       |   |        |      |        |      |        |      |       |      |
|---------|------|---------------------------------------|---|--------|------|--------|------|--------|------|-------|------|
| 187.1   | 13.3 | 5-guanidino-3-methyl-2-oxo-pentanoate | + | 0.007  | 0.46 | 0.031  | 0.5  | <0.001 | 3.02 | 0.008 | 3.3  |
| 466.311 | 3.5  | Cholesterolsulfate                    | - | <0.001 | 3.47 | <0.001 | 3.49 | 0.82   | 1.04 | 0.75  | 1.05 |

\*ND: not detected at control samples without oxLDL treatment means there was no sample peak or it was below the range of detection.; m/z: the mass-to-charge ratios; RT: metabolite matches standard retention time.

|    | A                                                                               | B             | C          | D           | E         | F           | G        | H        | I        | J        | K        | L        | M        | N        | O        | P        | Q        | R        | S        | T        | U        | V        | W        |
|----|---------------------------------------------------------------------------------|---------------|------------|-------------|-----------|-------------|----------|----------|----------|----------|----------|----------|----------|----------|----------|----------|----------|----------|----------|----------|----------|----------|----------|
| 1  | Id                                                                              | Mass (m/z RT) | Putative n | Map         | Pathway   | K1C1        | K1C2     | K1C3     | K1T1     | K1T2     | K1T3     | W1C1     | W1C2     | W1C3     | W1T1     | W1T2     | W1T3     | P1       | P2       | P3       | P4       | P5       |          |
| 2  | 116                                                                             | 174.0165      | 18.4534    | cis-Aconiti | Carbohydr | Citrate cyc | 277201.8 | 285804.9 | 283967   | 370951.5 | 436722.6 | 413303.9 | 205898.1 | 229285   | 224589.6 | 286089.5 | 263709   | 241328.5 | 123973.7 | 198451.4 | 161504   | 178796.9 | 152199.5 |
| 3  | 253                                                                             | 506.9956      | 16.70135   | ATP         | Energy Me | Oxidative   | 296088.1 | 312551.1 | 298400.8 | 341055   | 372805.2 | 354471.6 | 258816.7 | 233439.3 | 232178.5 | 349988.2 | 323688.1 | 297388   | 364180.5 | 310809.2 | 330553.7 | 353647.1 | 305366   |
| 4  | 335                                                                             | 260.0297      | 16.80892   | D-Glucose   | Carbohydr | Starch anc  | 18810.05 | 18719.88 | 17747.04 | 19741.98 | 19994.38 | 20286.43 | 14562.92 | 8555.221 | 12477.78 | 17551.41 | 18727.03 | 19902.64 | 24062.64 | 21674.79 | 20890.02 | 20696.19 | 27204.21 |
| 5  | 365                                                                             | 665.1243      | 13.11633   | NADH        | Energy Me | Oxidative   | 15141.91 | 13728.67 | 13628.24 | 19929.97 | 18218.88 | 21863.52 | 10585.34 | 11848.03 | 12091.39 | 20519.37 | 18461.3  | 16403.22 | 9053.478 | 16026.06 | 17586.85 | 16599.28 | 21832.55 |
| 6  | 368                                                                             | 132.006       | 16.38615   | Oxaloacet   | Carbohydr | Citrate cyc | 3401.215 | 3360.957 | 3394.325 | 3403.987 | 3408.014 | 3402.365 | 3318.959 | 3289.92  | 3269.056 | 3959.579 | 3979.408 | 3999.237 | 4017.974 | 2871.003 | 3024.384 | 4332.986 | 3352.996 |
| 7  | 425                                                                             | 276.0247      | 18.0255    | 6-Phospho   | Carbohydr | Pentose pl  | 8244.068 | 9435.379 | 6932.648 | 11474.36 | 10039.91 | 10647.94 | 4806.647 | 5109.573 | 6591.383 | 8745.063 | 8375.714 | 8006.364 | 9362.08  | 9118.036 | 8947.48  | 7307.172 | 7273.222 |
| 8  | 580                                                                             | 339.996       | 18.57917   | Fructose 1  | Energy Me | Carbon fixi | 6304.875 | 6381.881 | 5973.122 | 6917.875 | 8990.26  | 7736.314 | 3583.249 | 2942.558 | 3169.924 | 5775.322 | 4821.423 | 3867.524 | 11740.59 | 7481.311 | 6543.671 | 7174.382 | 5577.122 |
| 9  | 592                                                                             | 192.0273      | 18.55615   | Citrate     | Carbohydr | Citrate cyc | 1437440  | 1334940  | 1324176  | 1125156  | 1179010  | 1195760  | 767843   | 810610   | 777958   | 651349   | 609372   | 567395   | 429664.5 | 464463.3 | 313529   | 386802.1 | 333173.5 |
| 10 | 671                                                                             | 260.0297      | 15.95649   | Fructose 6  | Carbohydr | Pentose pl  | 20810.05 | 25917.74 | 19473.08 | 21983.24 | 21069.3  | 18894.01 | 14562.92 | 14476.57 | 15710.65 | 17551.41 | 18008.79 | 18466.16 | 16114.53 | 18158.54 | 17926.94 | 18586.49 | 20616.17 |
| 11 | 694                                                                             | 182.0791      | 13.65299   | Mannitol    | Carbohydr | Fructose a  | 112161.2 | 111846.5 | 107914   | 112128.9 | 116537.5 | 95994.21 | 52029.36 | 56489.17 | 68921.07 | 83880.36 | 92603.25 | 101326.1 | 52966.14 | 84399.1  | 85662.32 | 100817.2 | 91432.36 |
| 12 | 807                                                                             | 118.0267      | 13.93982   | Succinate   | Carbohydr | Citrate cyc | 337875.3 | 324929.6 | 274233   | 382493.7 | 379868.2 | 401766.8 | 610007.6 | 882299.7 | 655250.8 | 630796.3 | 578967.2 | 527138.1 | 540805.5 | 378890.1 | 318994.4 | 202570.4 | 127094.3 |
| 13 | 847                                                                             | 230.019       | 15.76523   | Ribose 5-p  | Carbohydr | Pentose pl  | 4863.99  | 5267.79  | 4745.44  | 5730.64  | 6135.31  | 6526.24  | 2302.17  | 2340.55  | 2606.62  | 3159.78  | 3140.21  | 3120.64  | 4759.002 | 5799.389 | 5913.166 | 4679.298 | 5131.037 |
| 14 | 866                                                                             | 176.032       | 15.68773   | Ascorbate   | Carbohydr | Ascorbate   | 23802.15 | 23981.37 | 17264.16 | 29687.16 | 16655.09 | 21687.72 | 14850.43 | 29952.13 | 19013.32 | 26239.97 | 18819.73 | 11399.5  | 26215.92 | 23885.51 | 19208.66 | 12110.71 | 9578.763 |
| 15 | 873                                                                             | 185.9929      | 17.27585   | 3-Phospho   | Carbohydr | Glycolysis  | 7750.001 | 6335.694 | 7128.477 | 5583.613 | 4740.883 | 5751.232 | 4751.32  | 5149.231 | 4685.215 | 3774.965 | 3918.159 | 4061.352 | 5610.958 | 5058.91  | 4108.764 | 5382.553 | 4926.717 |
| 16 | 885                                                                             | 427.0297      | 15.12579   | ADP         | Energy Me | Oxidative   | 20165.82 | 19232.19 | 18319.81 | 18923.05 | 23086.82 | 21235.02 | 15337.52 | 13966.98 | 14119.01 | 19486.76 | 17862.45 | 16238.13 | 18079.41 | 22021.4  | 20353.9  | 21149.62 | 20438.88 |
| 17 | 960                                                                             | 745.091       | 17.3333    | NADPH       | Energy Me | Photosynt   | 6880     | 6530     | 6960     | 8760     | 8000     | 8340     | 5080     | 5140     | 5810     | 6420     | 6070     | 6136.099 | 5659.922 | 6364.469 | 2303.579 | 1097.513 | 772.5307 |
| 18 | 1000                                                                            | 88.01604      | 8.295672   | Pyruvate    | Carbohydr | Glycolysis  | 656931.6 | 625458.1 | 632009.3 | 392505.7 | 467884.1 | 469707.3 | 529035.8 | 585567.8 | 590899.3 | 383695.3 | 362430.8 | 341166.3 | 233989.9 | 340903.8 | 323120.9 | 340932.4 | 335834.5 |
| 19 | 1116                                                                            | 92.04731      | 10.1335    | Glycerol    | Carbohydr | Galactose   | 1194225  | 131078   | 54589.05 | 64313.63 | 66605.93 | 67614.21 | 351417.2 | 2332150  | 238493.1 | 68310.77 | 63742.87 | 59174.96 | 75691.74 | 175354   | 171877.4 | 201661.6 | 161495.1 |
| 20 |                                                                                 |               |            |             |           |             |          |          |          |          |          |          |          |          |          |          |          |          |          |          |          |          |          |
| 21 | m/z: the mass-to-charge ratios ; RT: metabolite matches standard retention time |               |            |             |           |             |          |          |          |          |          |          |          |          |          |          |          |          |          |          |          |          |          |

Figure 1. Some raw data were used for PCA analysis.

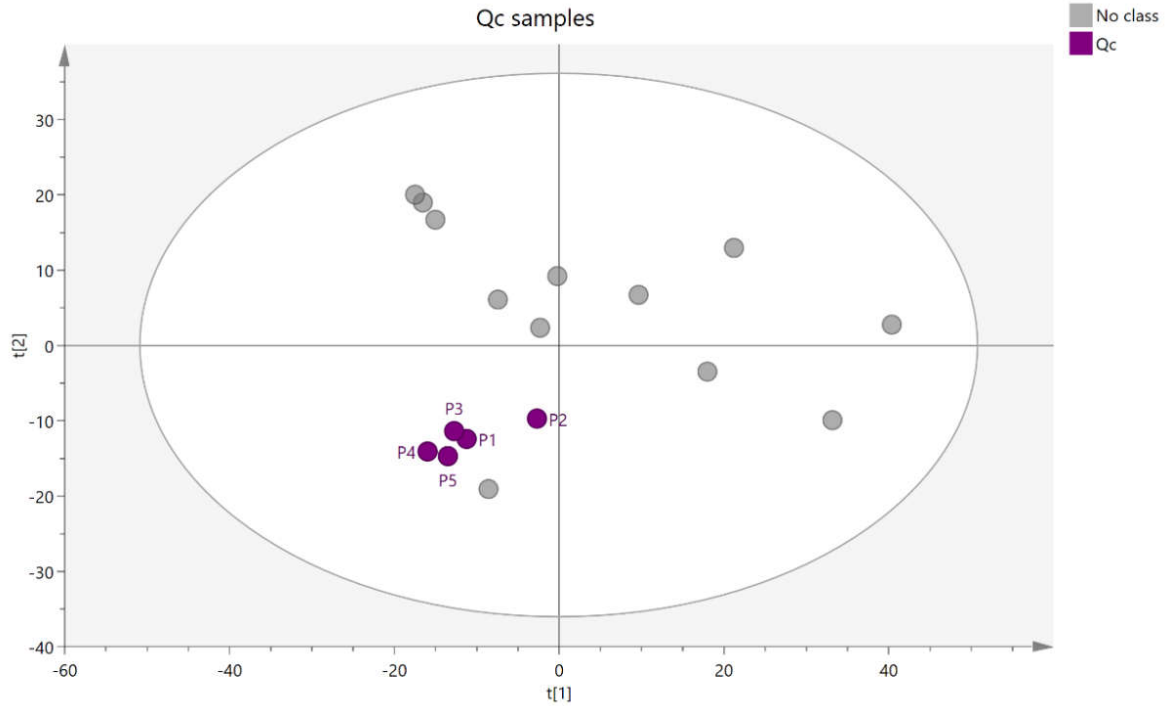

**Figure 2.** Principle component analysis (PCA) score plot for quality control (QC) (pooled) cell extract samples of wildtype and TSPO knockout RPE cells. P1, P2, P3, P4 and P5 are pooled (QC) sample running throughout the experiment and reflecting the goodness of device sensitivity.

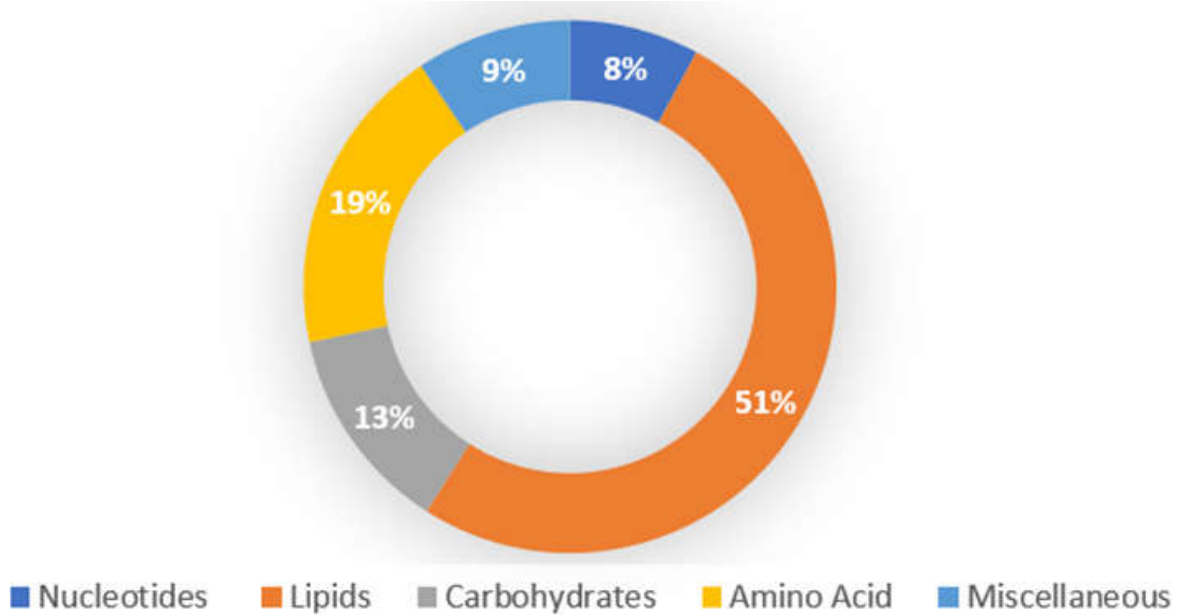

**Figure 3.** Overview for implication of different pathways to all significant affected metabolites. Lipid pathway is the most influenced pathway while nucleotides were the least.
